# Supplementary material for: Antiplatelet Effects of Flavonoid Aglycones Are Mediated by Activation of Cyclic Nucleotide-Dependent Protein Kinases
Source: MDPI journal article supplement (doi:10.3390/ijms25094864), 2024-04-29

Figure S1  
Structure of the tested compounds

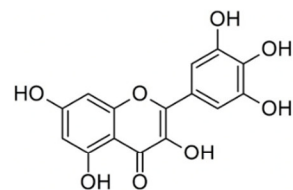

Myricetin

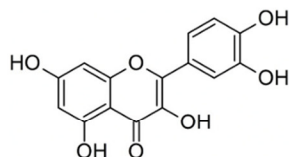

Quercetin

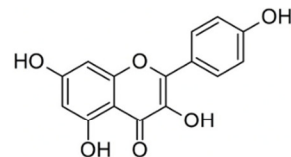

Kaempferol

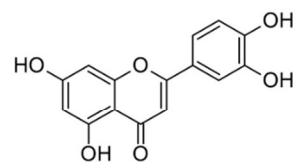

Luteolin

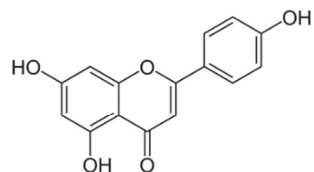

Apigenin

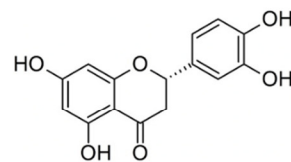

Eriodictyol

Figure S2

High-performance liquid chromatography (HPLC) chromatograms of the isolated compounds: 1 – kaempferol; 2 – quercetin; 3 – eriodictyol

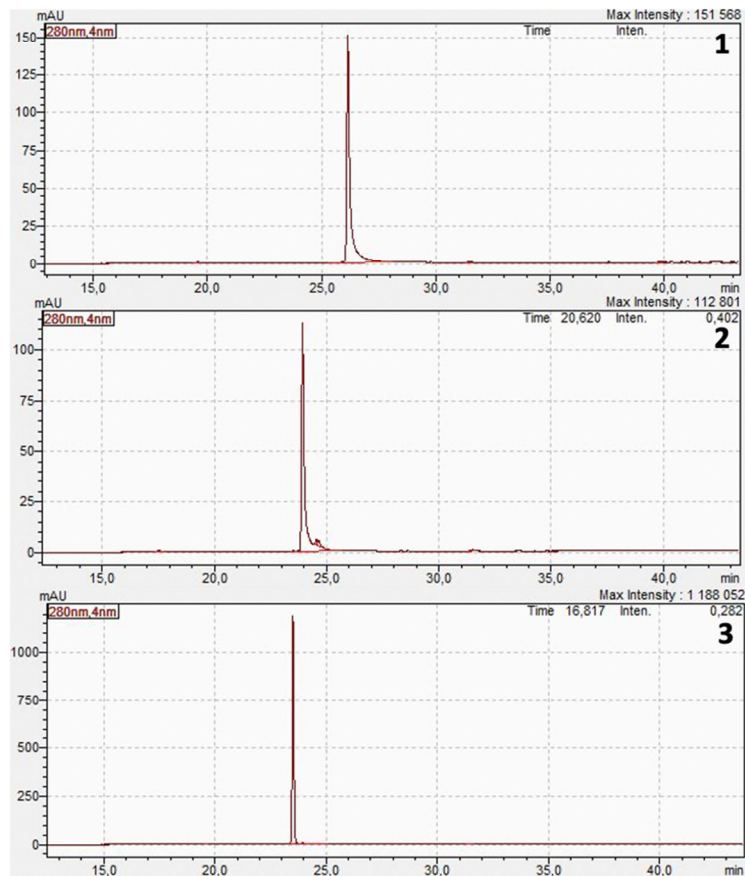

**Figure S2.** The purity of isolated compounds was 97%, 95% and 99% for kaempferol, quercetin and eriodictyol respectively. The structure of the isolated compounds was elucidated by NMR-spectroscopy. The purity of the compounds was estimated by HPLC using a Prominence LC-20 with a SPD-M20A diode-array detector (Shimadzu corp., Japan) with a Supelcosil LC18 column (250 4.6, 5  $\mu$ m). The flow rate was 1 mL/min. Analysis temperature - 40 °C. Eluent: water (component A), acetonitrile (component B) with a TFA content of 0.1% (from H<sub>2</sub>O : CH<sub>3</sub>CN 5 : 95 to H<sub>2</sub>O: CH<sub>3</sub>CN 0 : 100, by volume). HPLC grade solvents used for HPLC analysis was J.T. Baker HPLC gradient grade.

**Figure S3**  
**Mass-chromatogram of sample 3**  
**1 – cGMP, 2 – internal standard, 3 – cAMP.**

D:\Xcalibur\data\cAMP\290124\_gambaryan3

01/29/24 17:15:36

RT: 0.00 - 11.01 SM: 11G

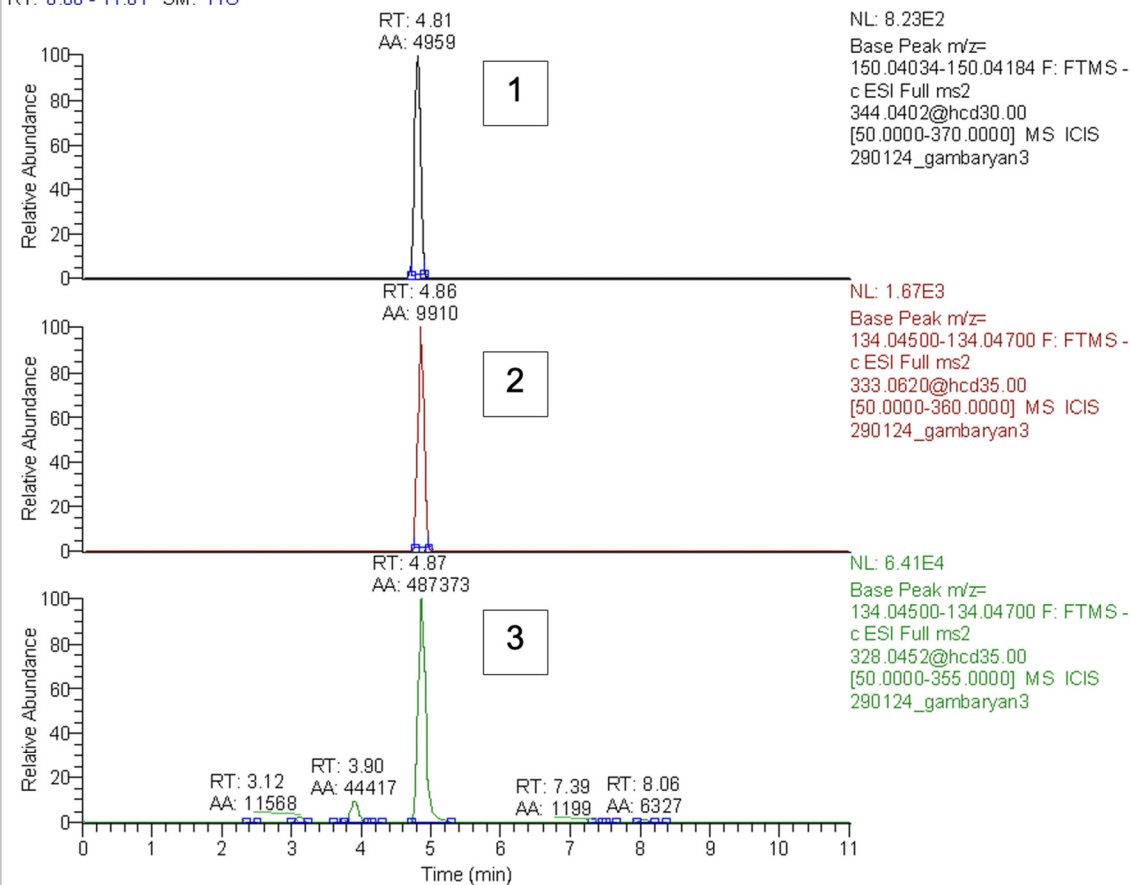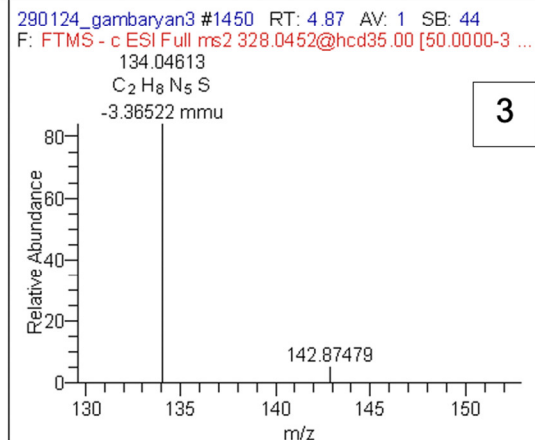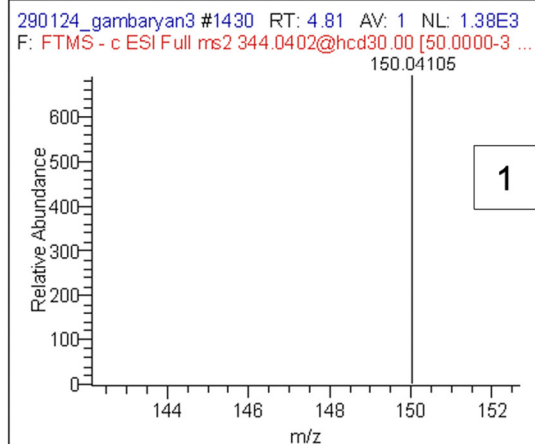

Table S1

Quantification of the cyclic nucleotides

Retention time (t<sub>R</sub>), multiple reaction monitoring (MRM) employed for identification and quantification of the compounds and internal standard (IS).

| Compound       | t <sub>R</sub> (min) | MRM1                  |
|----------------|----------------------|-----------------------|
| cAMP           | 4.87                 | 328.0452 => 134.0457  |
| cGMP           | 4.81                 | 344.0402 => 150.04109 |
| cAMP-13C5 (IS) | 4.87                 | 333.0620 => 134.0457  |



Figure S4  
Full blots of figure 6a

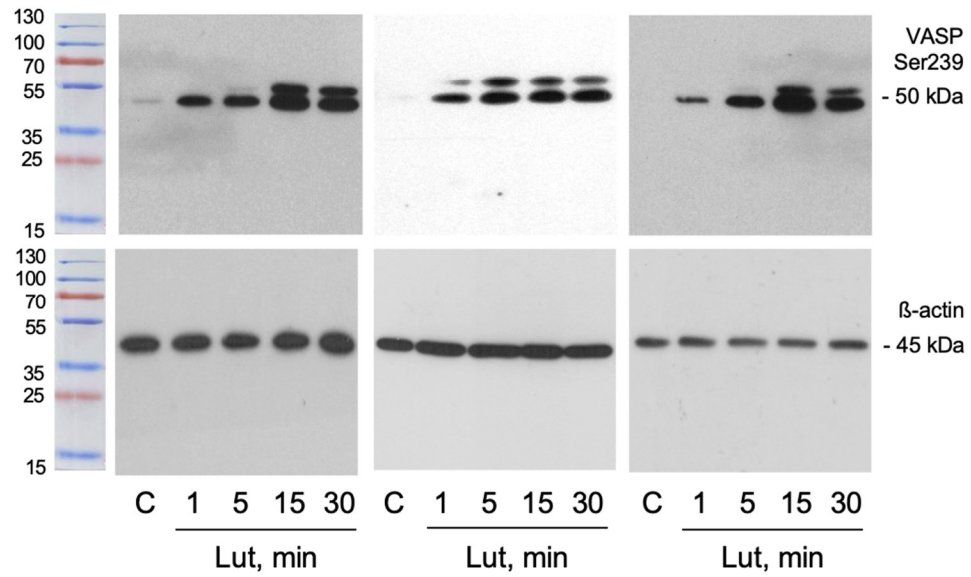

Figure S5  
Full blots of figure 6b

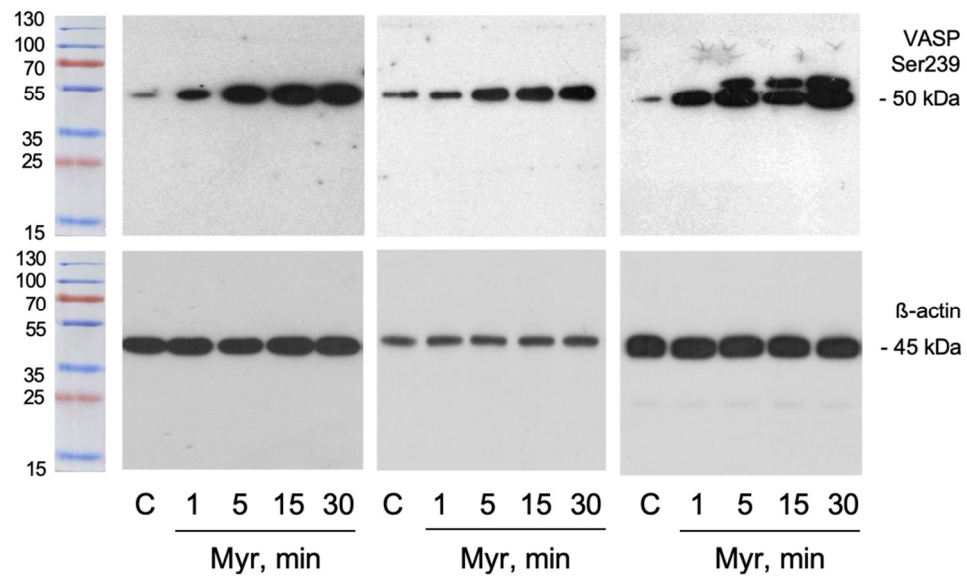

Figure S6  
Full blots of figure 6c

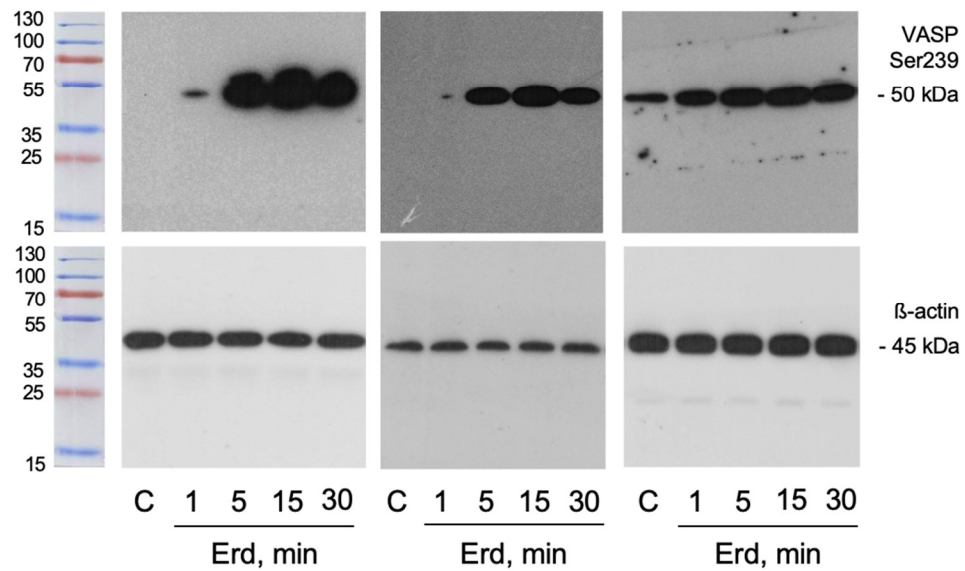

Figure S7  
Full blots of figure 6d

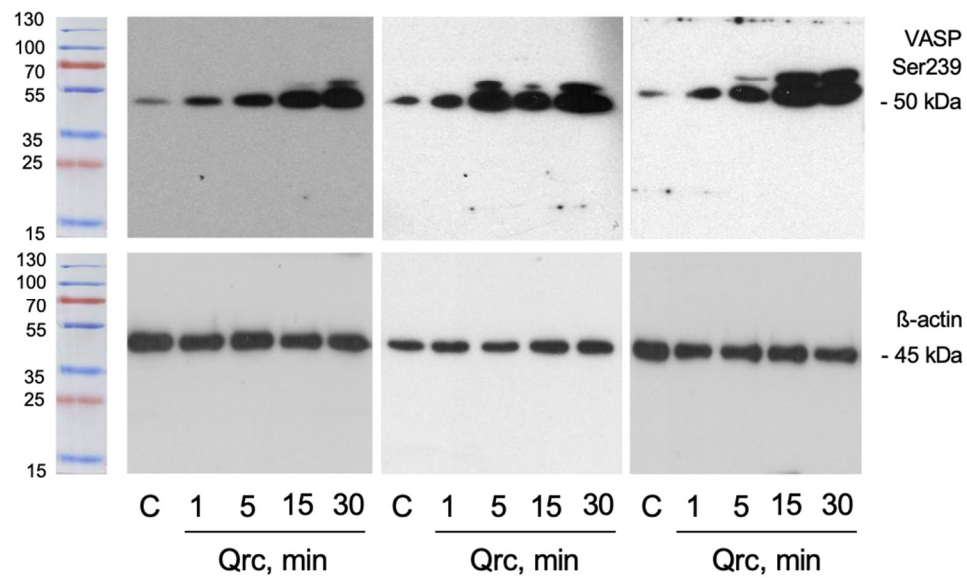

Figure S8  
Full blots of figure 6e

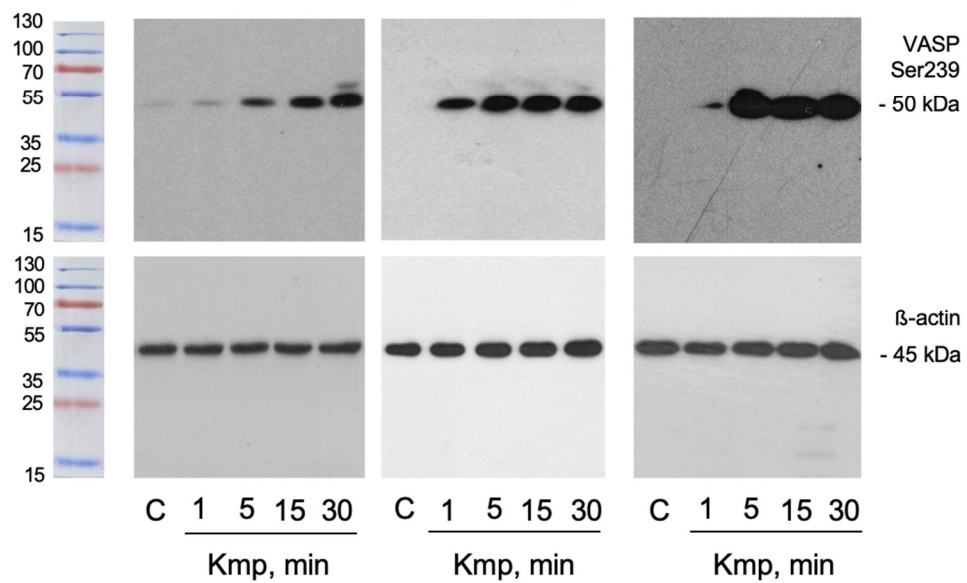

Figure S9  
Full blots of figure 6f

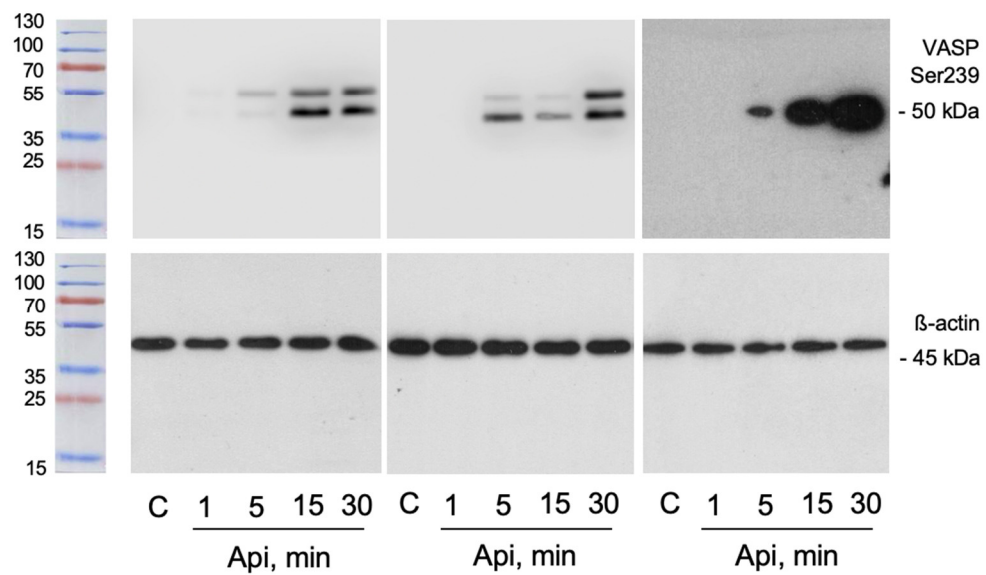

Figure S10  
Full blots of figure 7a

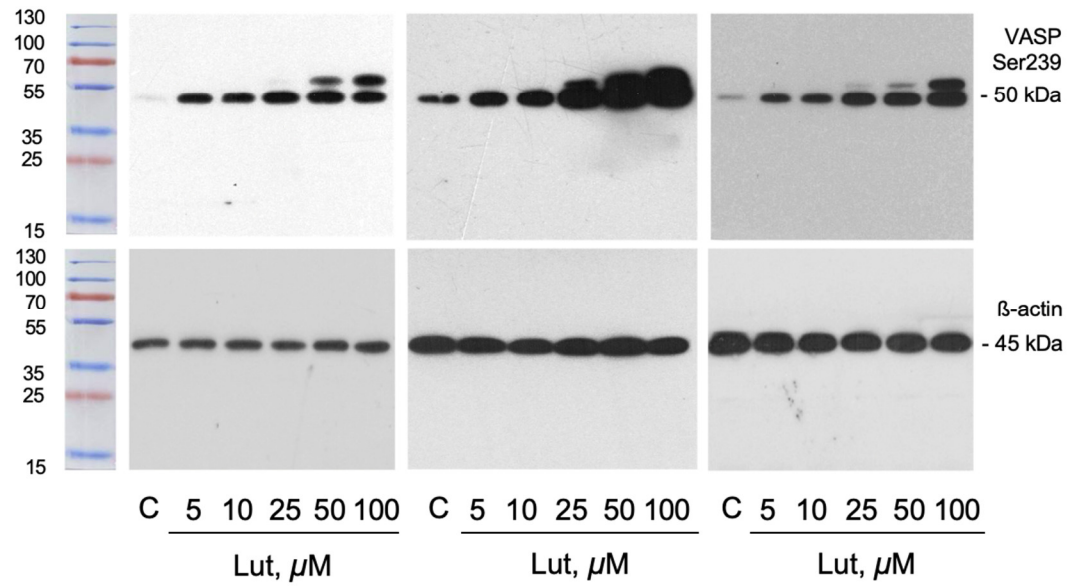

Figure S11  
Full blots of figure 7b

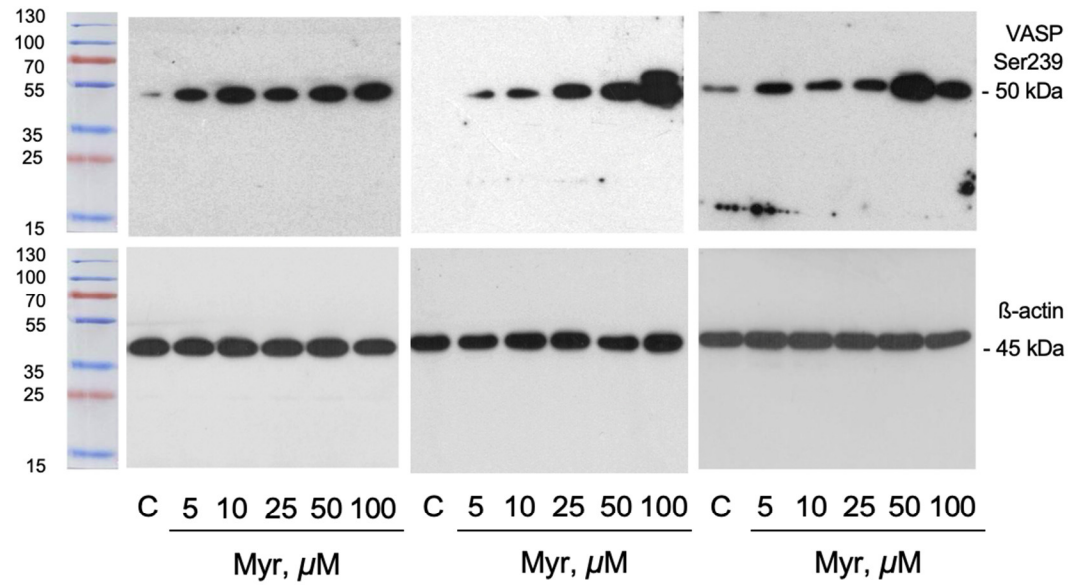



Figure S12  
Full blots of figure 7c

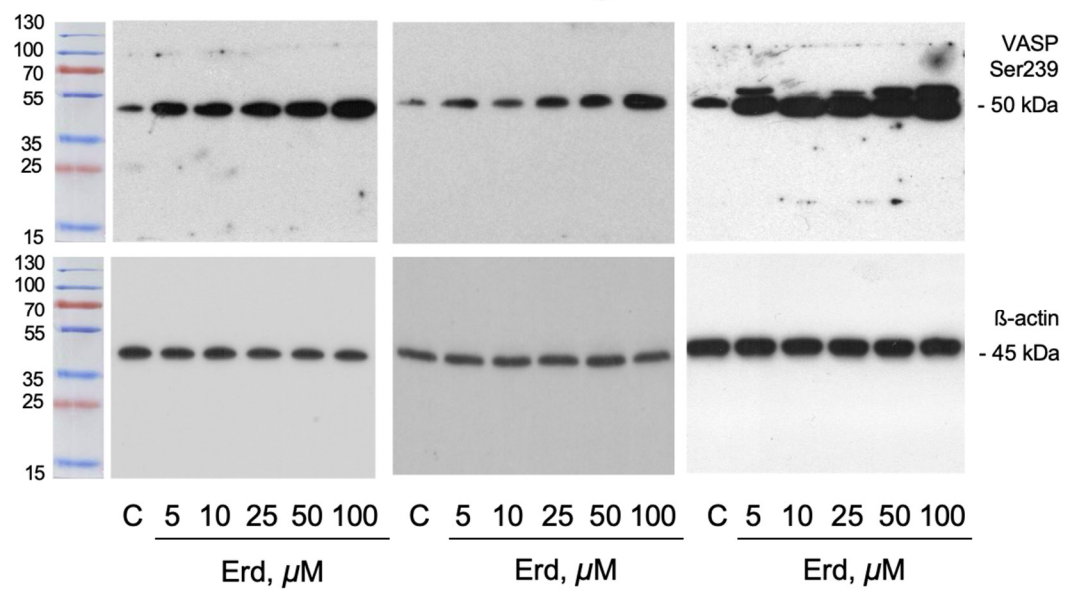

Figure S13  
Full blots of figure 7d

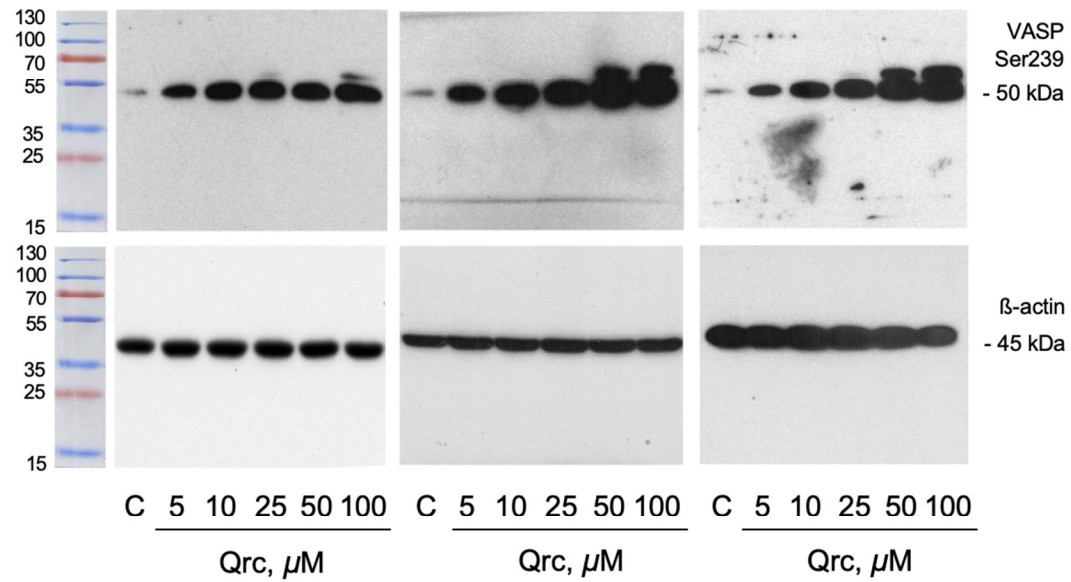

Figure S14  
Full blots of figure 7e

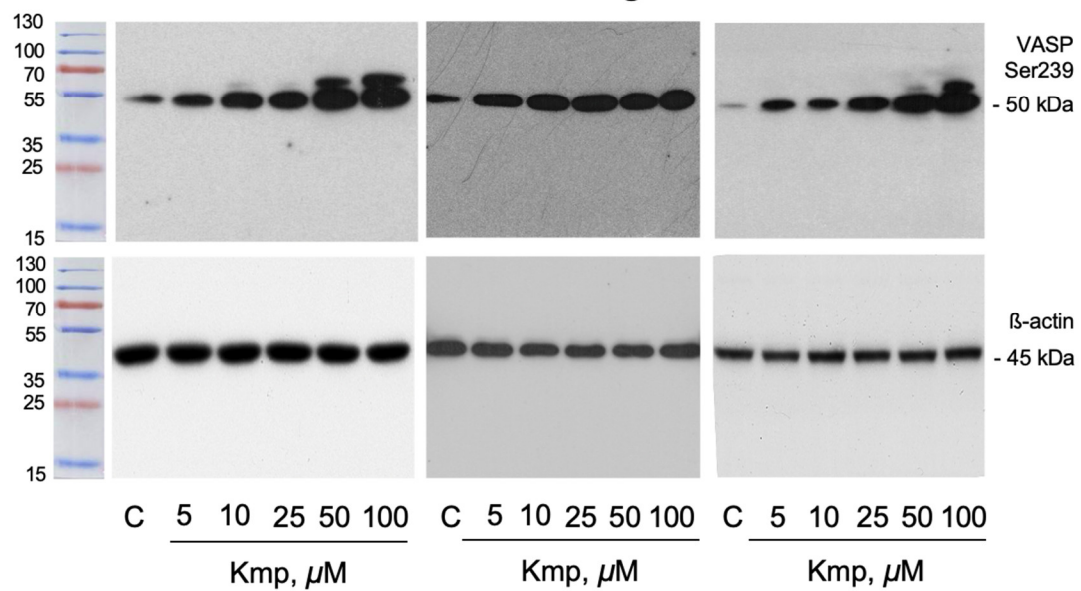

**Figure S15**  
**Full blots of figure 7f**

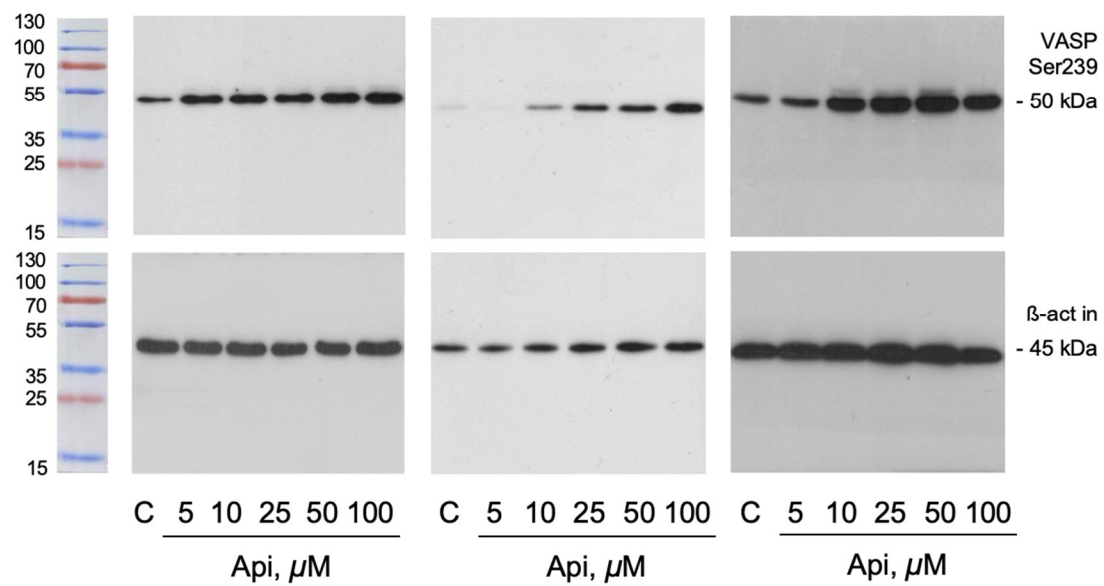

Figure S16: Full blots of figures 8 a-b

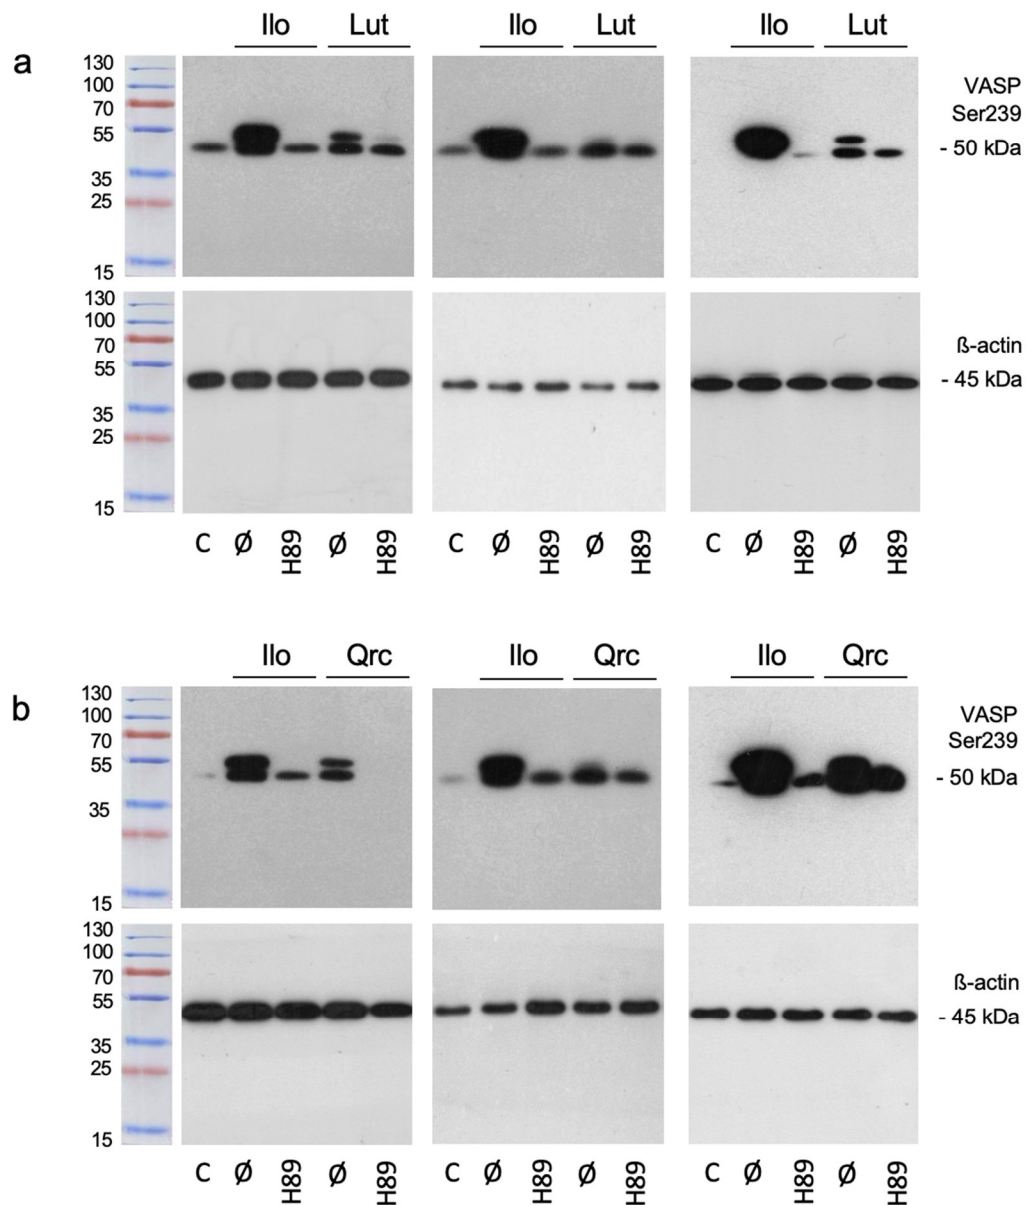

Figure S17  
Full blots of figure 9a

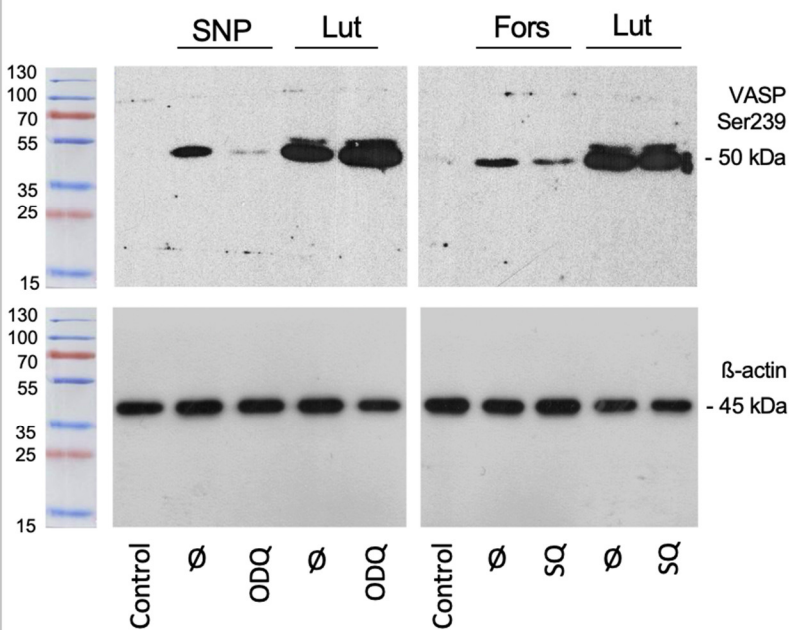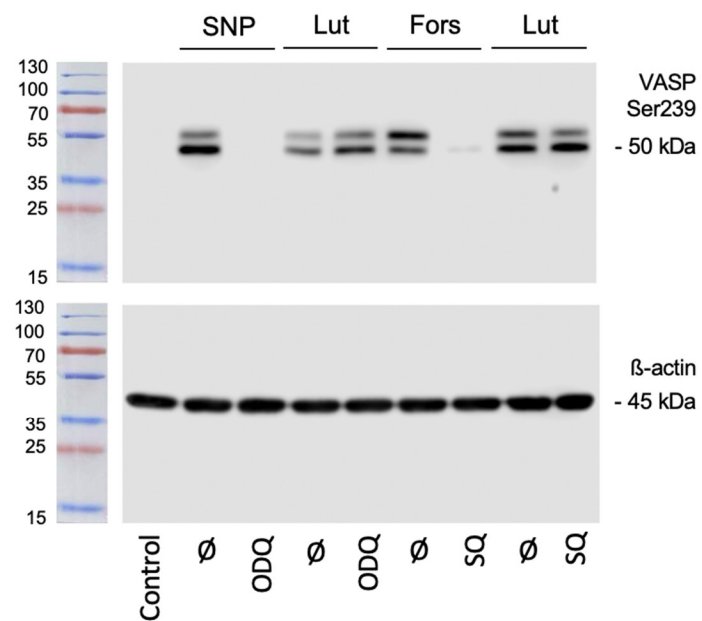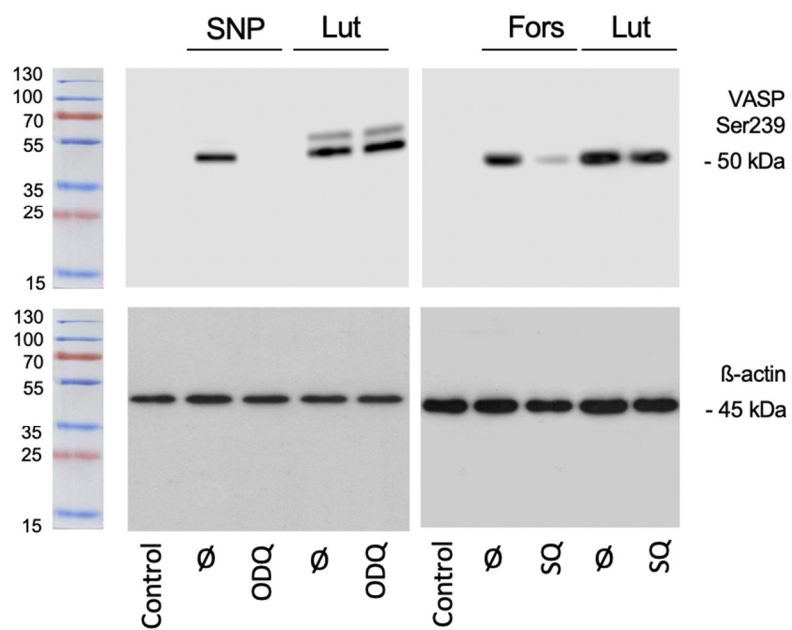

Figure S18  
Full blots of figure 9b

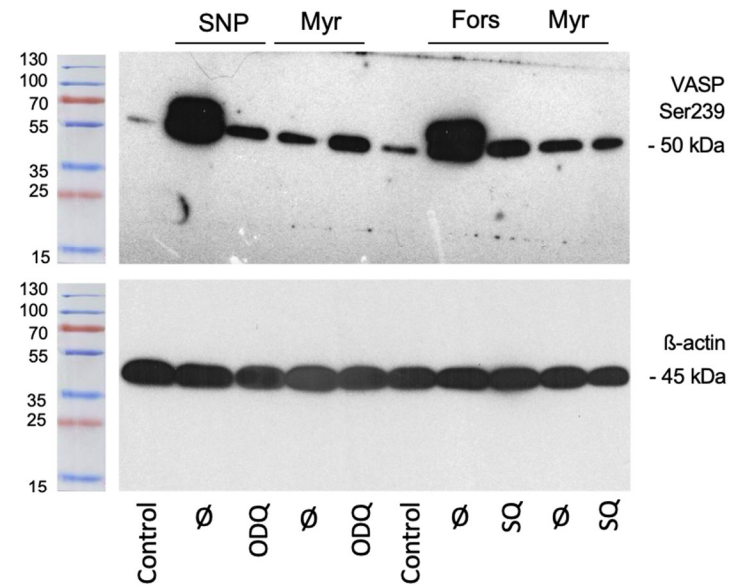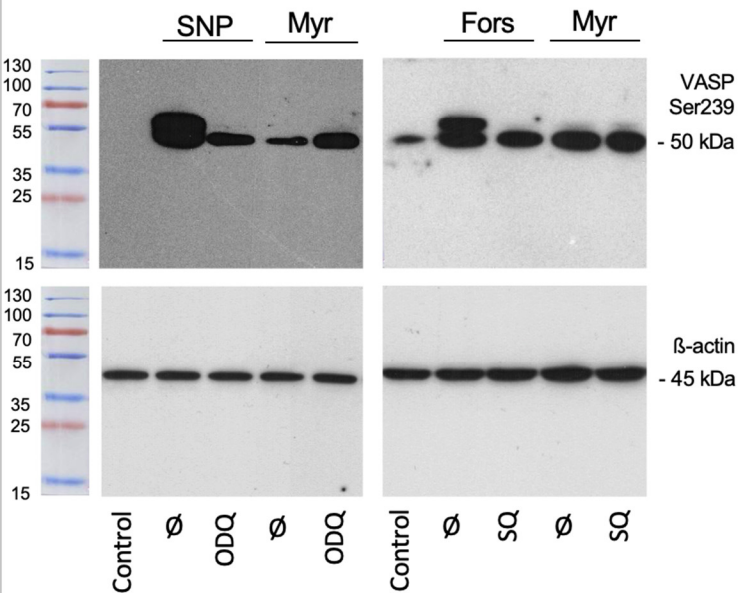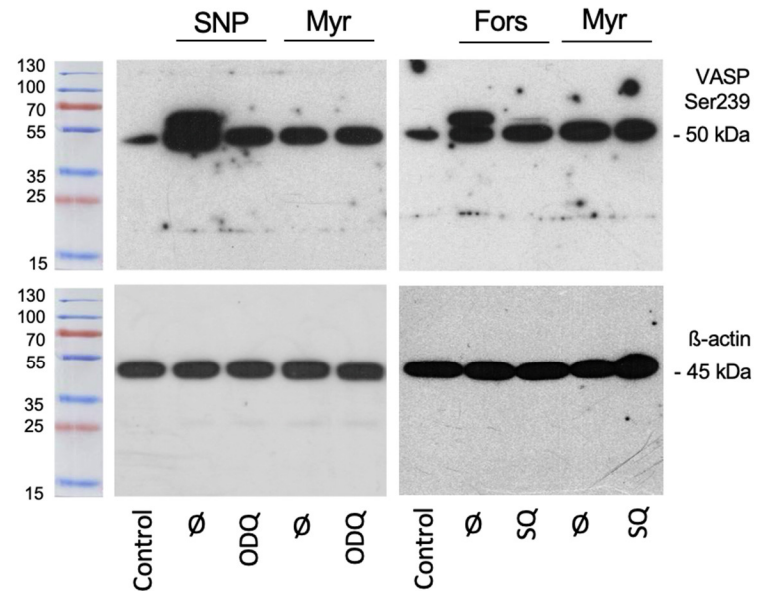



Figure S19  
Full blots of figure 9c

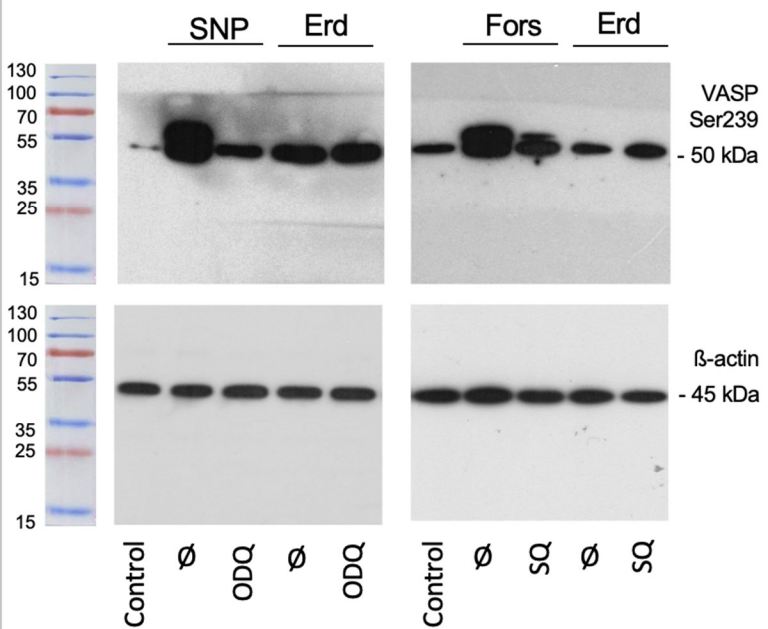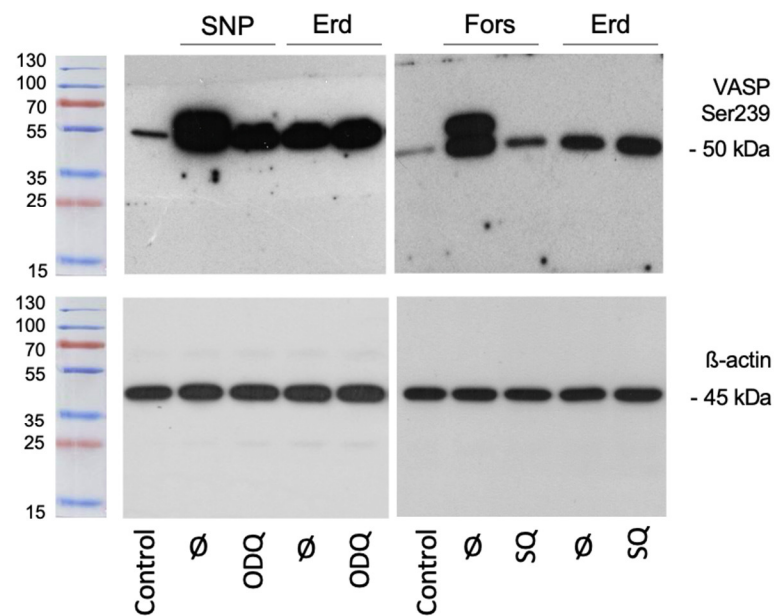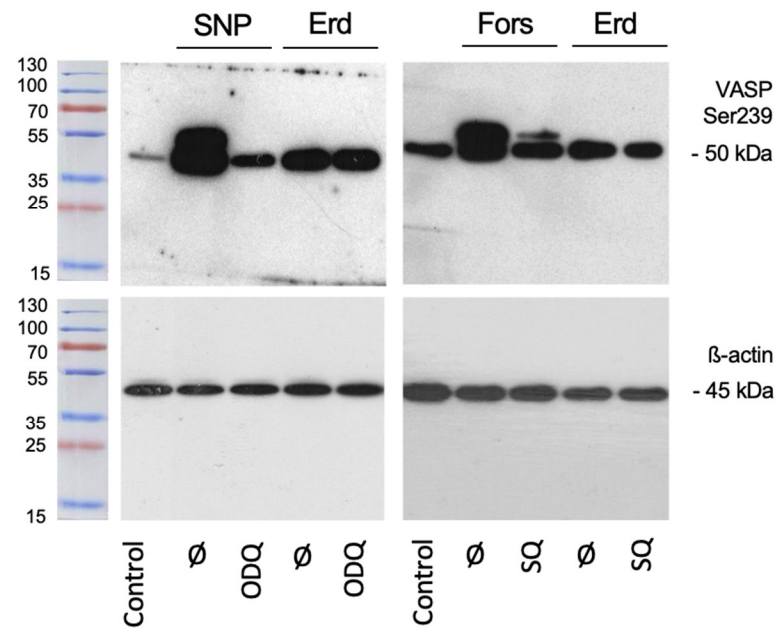



Figure S20  
Full blots of figure 9d

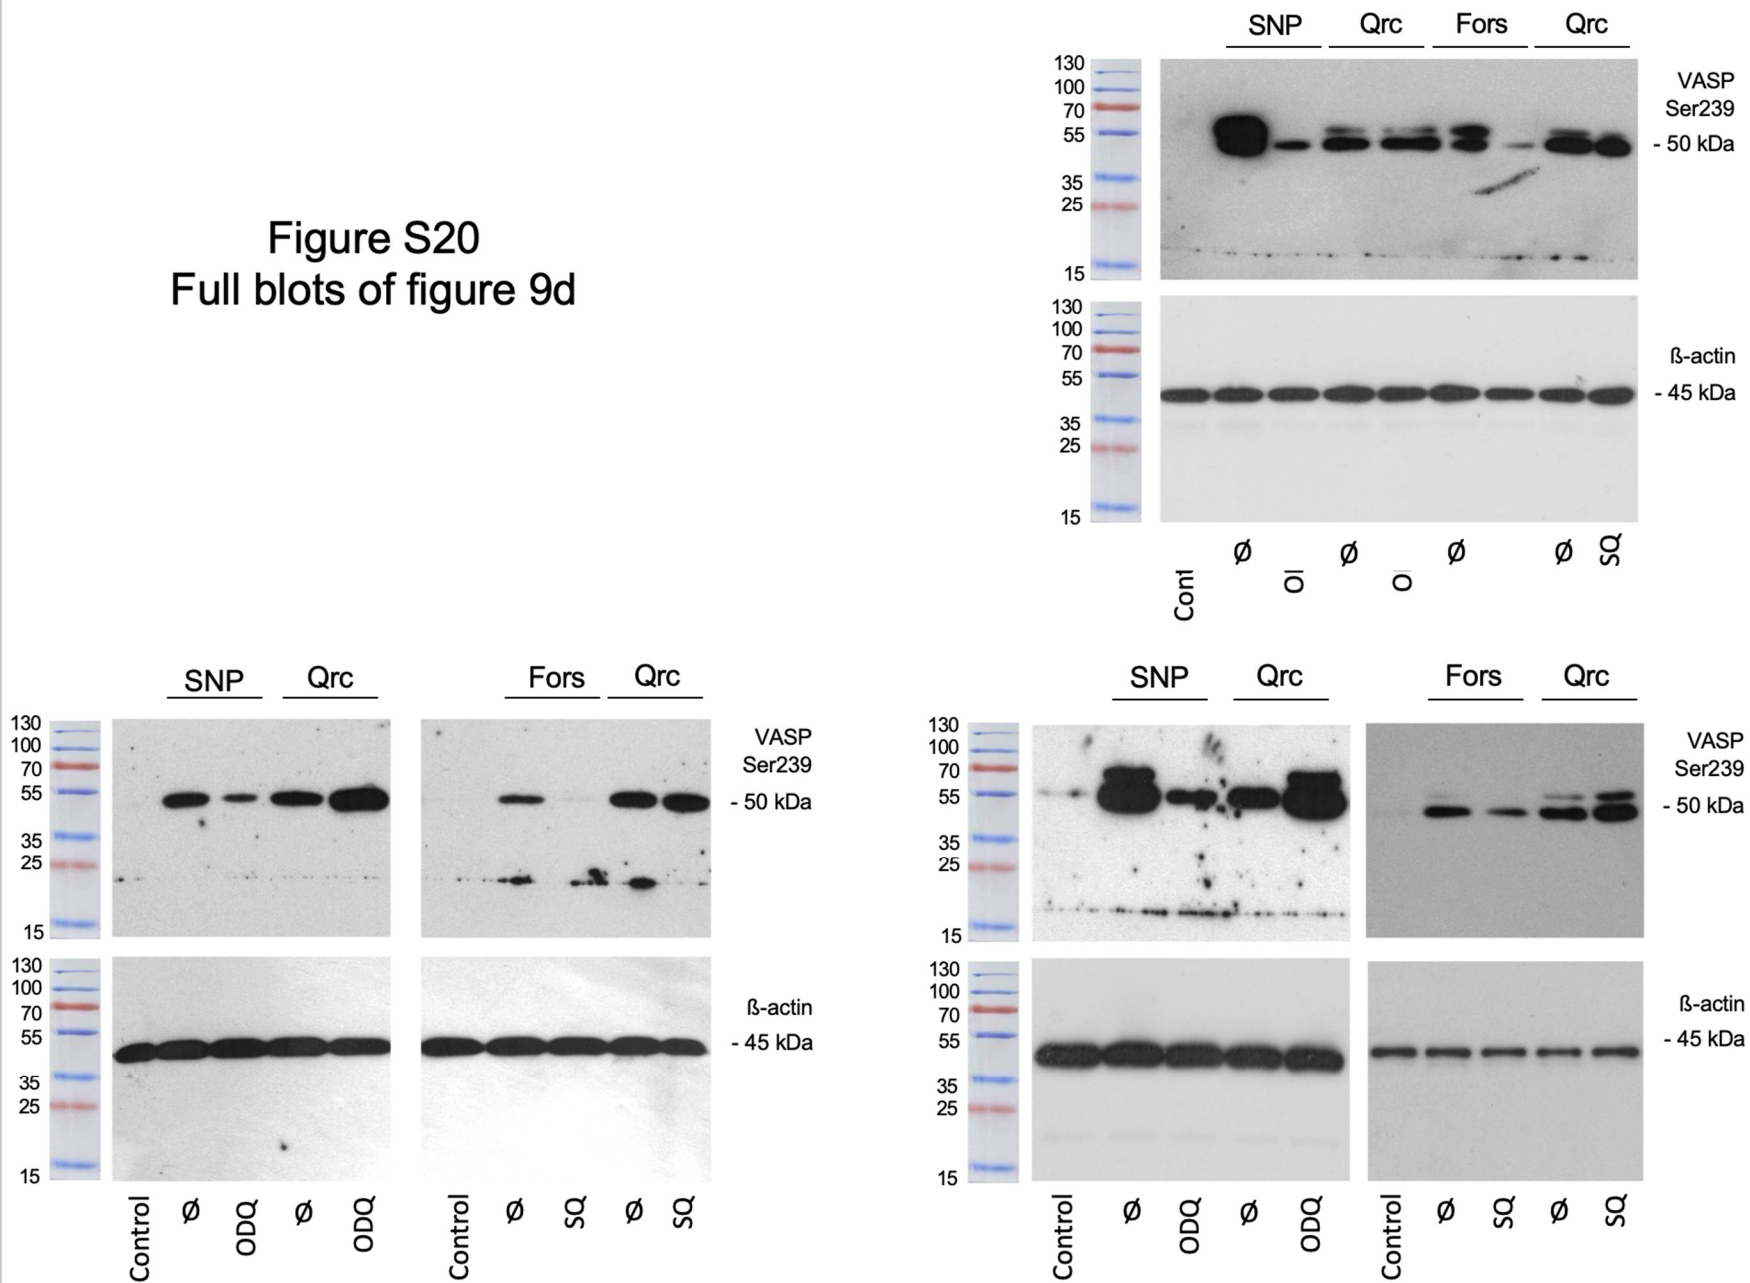

Figure S21  
Full blots of figure 9e

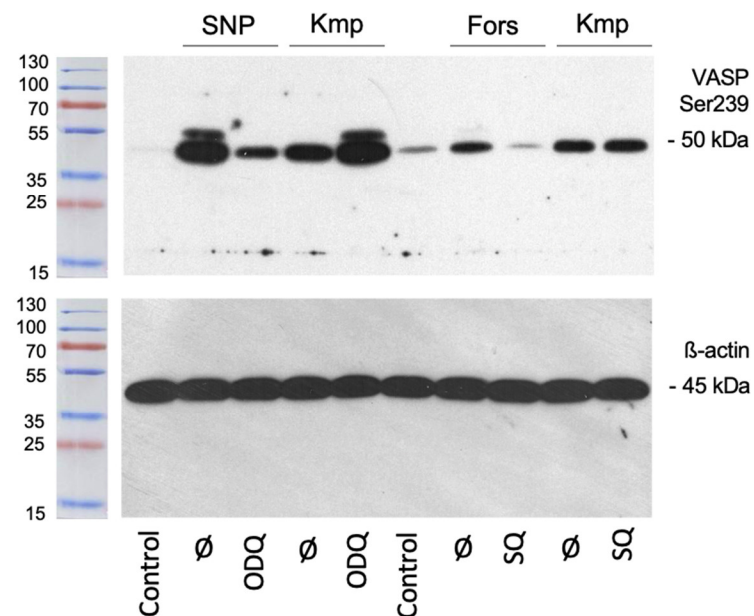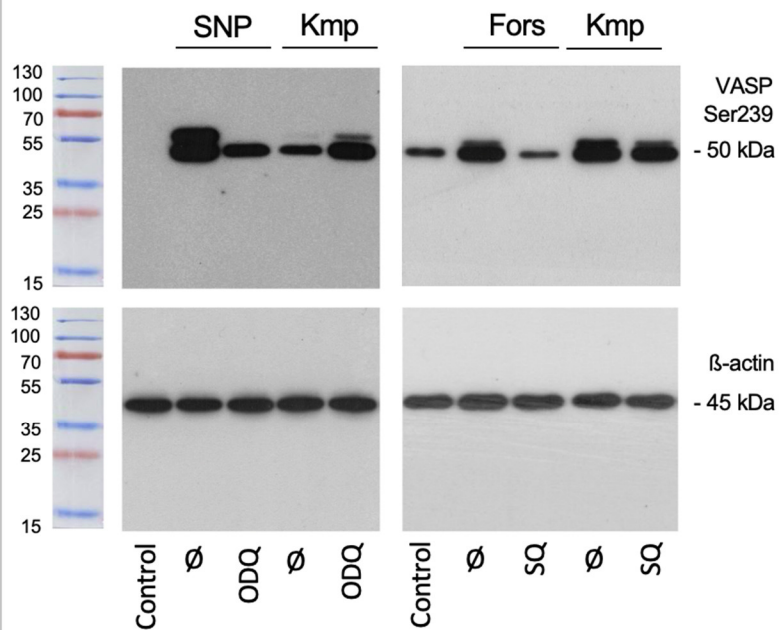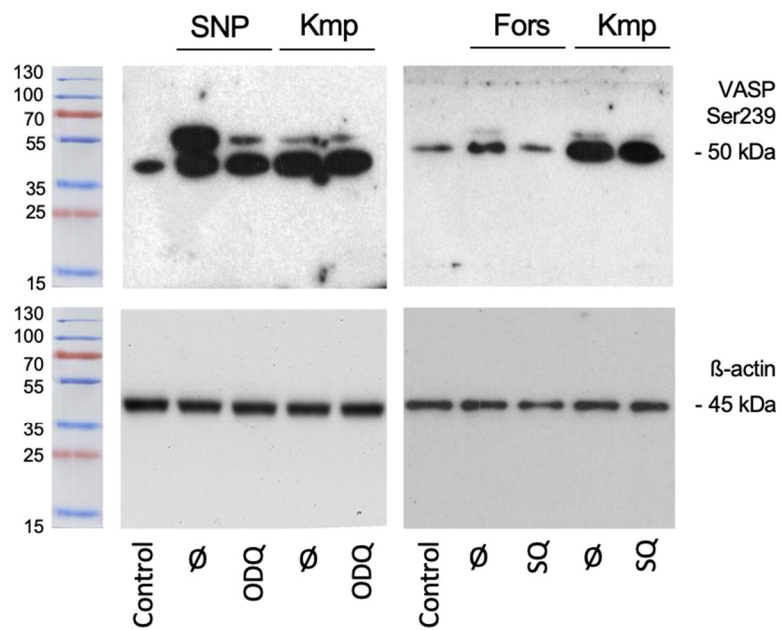

Figure S22  
Full blots of figure 9f

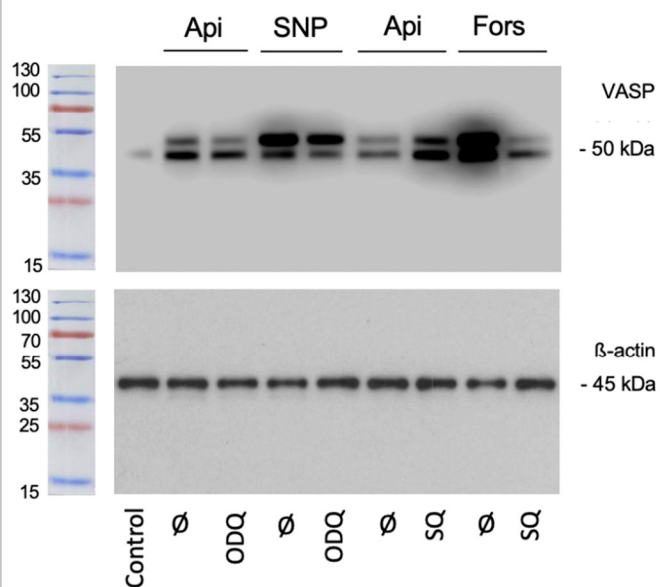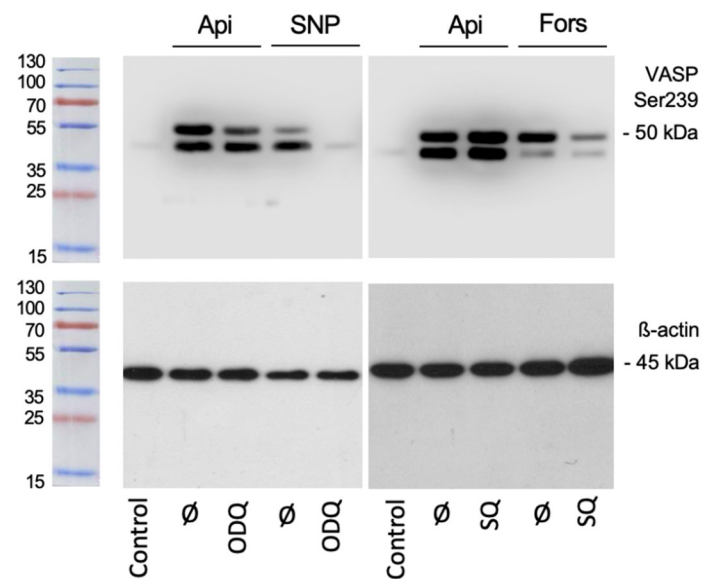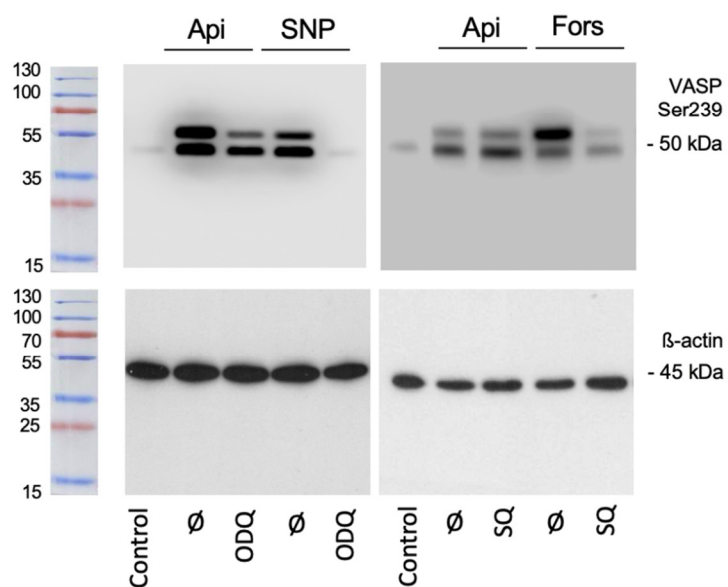

Figure S23  
Full blots of figure 12

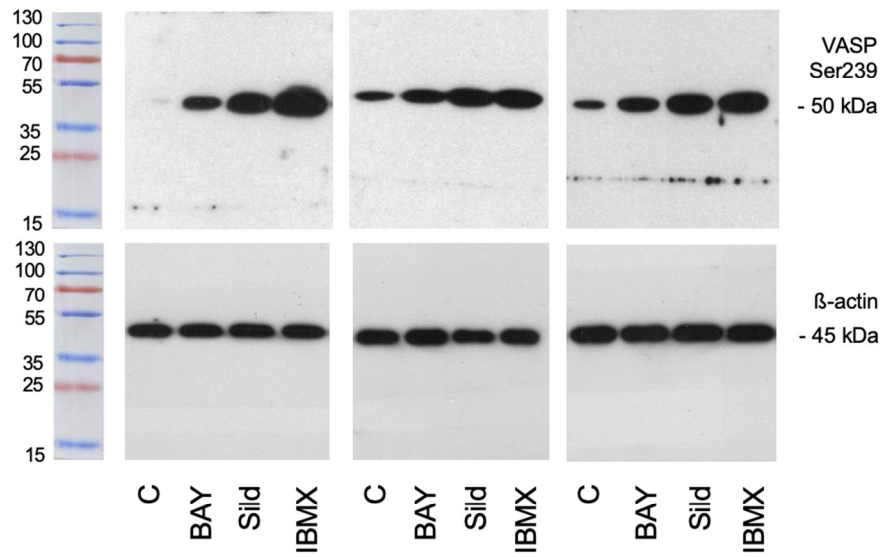

Supplement: s1 [file s1]
